# Supplementary material
Source: HighWire-hosted journal article supplement (https://tobaccocontrol.bmj.com/content/31/1/73)
Supplement: inline-supplementary-material-7 [file inline-supplementary-material-7.pdf]

Supplementary Table 4. Distribution of collected legal packs<sup>1</sup> by the presence of official tax stamp for the *PLS*, *FTF-householdbrandcigarette*<sup>2</sup>, or *PDG* survey, 2018-2019.

| Methods <sup>2</sup>                                                                            | Is there an official tax stamp visible on the packs? |                                              |      |     |
|-------------------------------------------------------------------------------------------------|------------------------------------------------------|----------------------------------------------|------|-----|
|                                                                                                 | Yes                                                  | It has only fragments/traces of the adhesive | No   |     |
| <b>Littered Pack Surveys</b>                                                                    | -                                                    | -                                            | -    |     |
| <i>PLS-RJ</i>                                                                                   | 44.0                                                 | 52.4                                         | 3.6  |     |
| <i>PLS-SP</i>                                                                                   | 37.6                                                 | 55.6                                         | 6.8  |     |
| <i>PLS-CG</i>                                                                                   | 45.4                                                 | 47.0                                         | 7.6  |     |
| <i>PLS-JP</i>                                                                                   | 41.3                                                 | 52.3                                         | 6.4  |     |
| <i>PLS-BH</i>                                                                                   | 45.3                                                 | 51.1                                         | 3.6  |     |
| <i>PDG</i>                                                                                      | 55.9                                                 | 38.4                                         | 5.7  |     |
| <b>Smokers who had the pack of their last purchase with them at the moment of the interview</b> | -                                                    | -                                            | -    |     |
| Direct observation of the pack <sup>3</sup>                                                     | RJ                                                   | 54.3                                         | 43.5 | 2.2 |
|                                                                                                 | SP                                                   | 70.2                                         | 29.1 | 0.7 |

<sup>1</sup>We used the official list of legal brands authorized by the Brazilian Health Regulatory Agency and the direct observation of the presence of Brazilian health warnings to define the legal status;<sup>2</sup> the overall number of packs collected/showed were, as follows: for the for the *PLS*, Rio de Janeiro (1,251), São Paulo (1,760), Campo Grande (3,907), Belo Horizonte (784), and João Pessoa (1,051); for the *FTF-householdbrand*, Rio de Janeiro (680), and São Paulo (598); for the *PDG*, Rio de Janeiro (2,705); <sup>3</sup> individuals who reported having bought less than one cigarette pack in their last purchase and/or did not physically showed the pack of their last purchase at the moment of the interview were excluded from the analysis.
